# Supplementary material for: Spilanthol Inhibits Inflammatory Transcription Factors and iNOS Expression in Macrophages and Exerts Anti-inflammatory Effects in Dermatitis and Pancreatitis
Source: MDPI journal article supplement (doi:10.3390/ijms20174308), 2019-09-03
Supplement: s1 [file s1]

## Supplementary material

### Supplementary Figure S1

Fig.S1

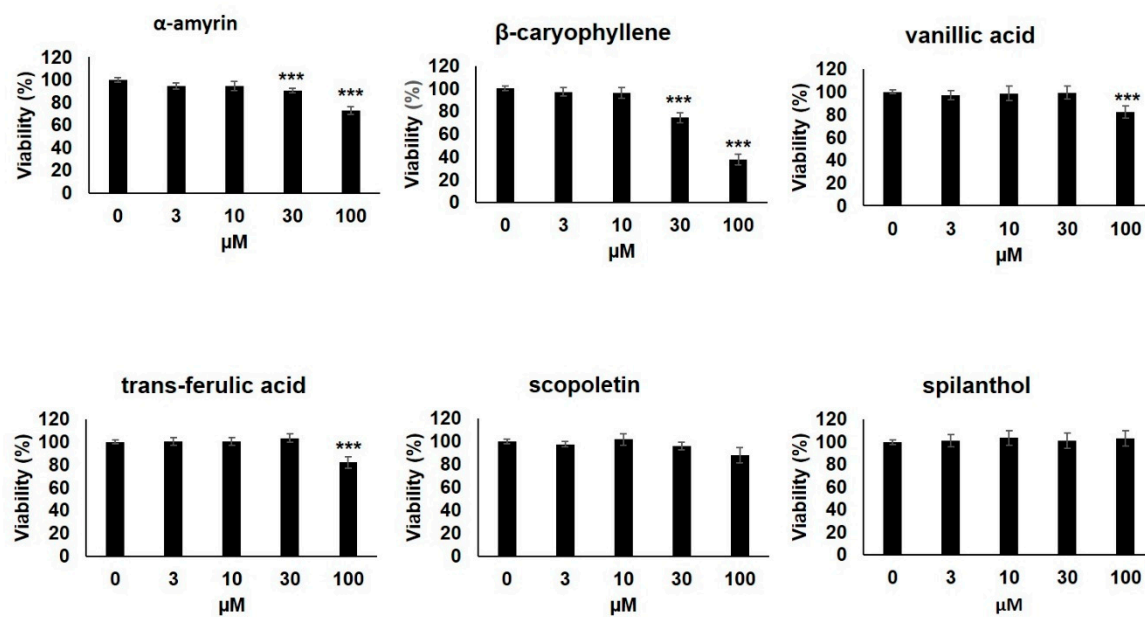

**Figure S1.** Cytotoxicity of selected chemical substances present in *S. acmella* extracts on RAW macrophages. Cells were treated with the test compounds at the indicated concentrations for 24 h, and cell viability was determined using MTT assay. (\*Stars indicate significant (\*\*\*)  $p < 0.001$ ) cytotoxic effect.)

**Fig.S2**

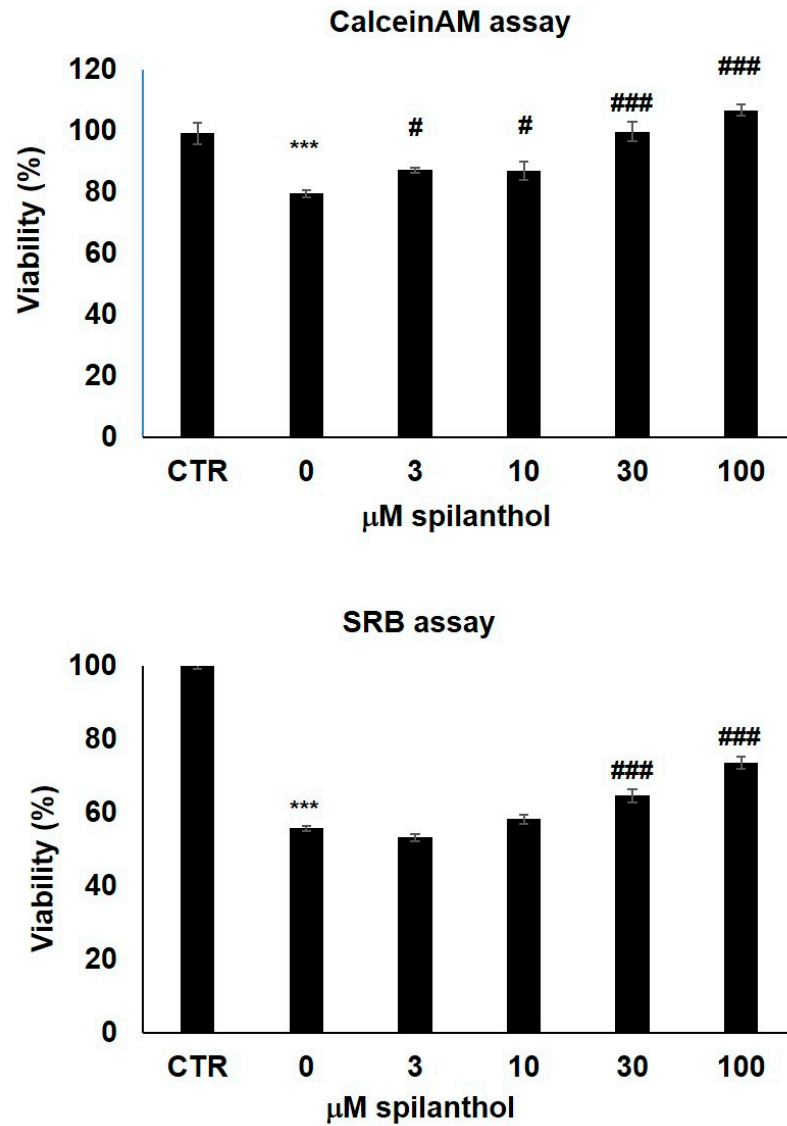

**Figure S2.** Confirmation of the cytoprotective effect of spilanthol in RAW macrophages. Cells were pretreated with spilanthol at the indicated concentrations for 2 h followed by treatment with LPS (10 ng/ml) and IFN $\gamma$  (10 ng/ml) for 24 h. Cell viability was determined using (A) CalceinAM and (B) SRB assays. (\*Stars indicate significant (\*\* $p < 0.001$ ) decrease of viability caused by IFN $\gamma$  + LPS treatment. #Hashmarks indicate significant (### $p < 0.001$ ) cytoprotection provided by spilanthol.).
